# Supplementary material
Source: MDPI journal article supplement (https://www.mdpi.com/2079-6412/14/3/320)
Supplement: s1 [file s1]

## Supplementary Information

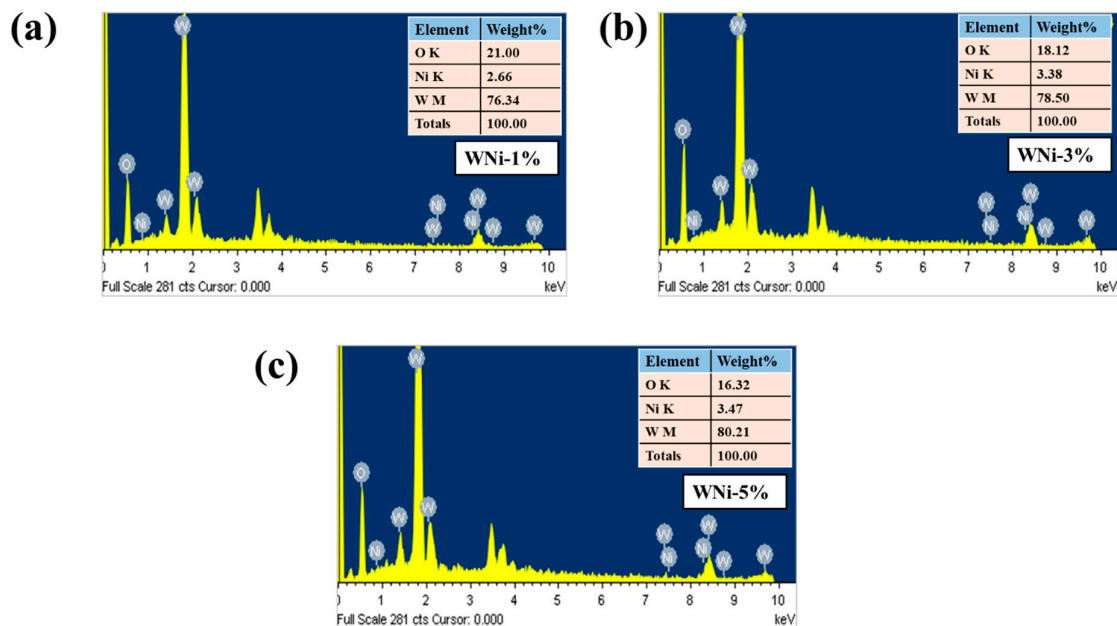

**Figure S1.** EDS spectra and mapping analysis image of the WNi-1%, WNi-3%, and WNi-5% thin films.

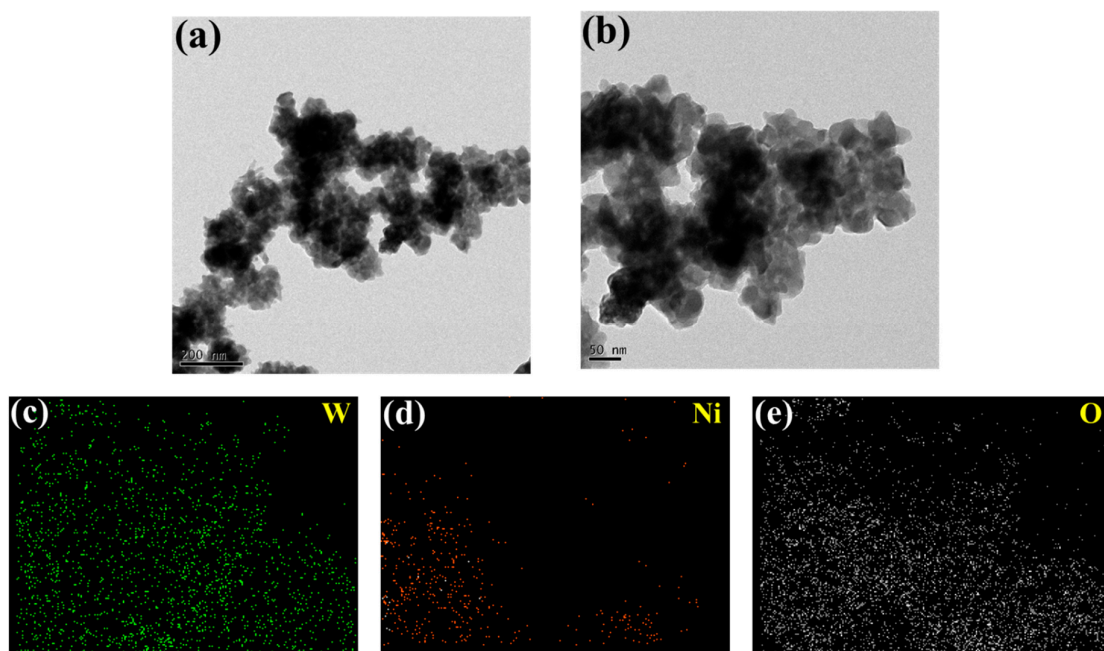

**Figure S2.** Transmission electron microscopy images of WNi-3% thin film at (a) 200 nm and (b) 50 nm, EDS elemental mapping of (c) W, (d) Ni, (e) O.

**Table S1.** Comparative parameters of electrodeposited Ni doped WO<sub>3</sub> films with the reported literature and present work of electrochromic performance.

| Sr. No. | Material                 | Electrolyte                                  | $\Delta T$ (%) | CE                       | Ref.         |
|---------|--------------------------|----------------------------------------------|----------------|--------------------------|--------------|
| 1       | Ni doped WO <sub>3</sub> | 1 M LiClO <sub>4</sub> +PC                   | 86             | 60.5 cm <sup>2</sup> /C  | [42]         |
| 2       | Ni doped WO <sub>3</sub> | EL-72 gel                                    | 78.31          | 60.62 cm <sup>2</sup> /C | [43]         |
| 3       | a-WO <sub>3</sub>        | 1 M LiClO <sub>4</sub> +PC                   | 50.4           | 54.7 cm <sup>2</sup> /C  | [44]         |
| 4       | NiO-WO <sub>3</sub>      | 0.5 M LiClO <sub>4</sub> and 0.05M Ferrocene | 84             | 55.2 cm <sup>2</sup> /C  | [45]         |
| 5       | Ni-WO <sub>3</sub>       | 1M LiClO <sub>4</sub> +PC                    | 61             | 68.5 cm <sup>2</sup> /C  | [24]         |
| 6       | Ce-WO <sub>3</sub>       | PVA gel                                      | 62.8           | 76.9 cm <sup>2</sup> /C  | [46]         |
| 7       | Ni-WO <sub>3</sub>       | 1M LiClO <sub>4</sub> +PC                    | 81.90          | 75.12 cm <sup>2</sup> /C | Present Work |
